# Supplementary material
Source: PubMed Central journal article supplement (PMC6089375)
Supplement: NIHMS976916-supplement-01.pdf [file NIHMS976916-supplement-01.pdf]

**Supplemental Table 1.** Baseline characteristics of study participants according to quintile of red and processed meat intake among women from the Nurses' Health Study (NHS) and men from the Health Professional Follow-up Study (HPFS)\*

|                                                                         | Red and processed meat intake quintile |             |             |             |             |
|-------------------------------------------------------------------------|----------------------------------------|-------------|-------------|-------------|-------------|
|                                                                         | 1                                      | 2           | 3           | 4           | 5           |
| <b>Women in NHS (1984)</b>                                              |                                        |             |             |             |             |
| Age (years)                                                             | 52.0 (7.0)                             | 50.7 (7.2)  | 50.1 (7.2)  | 49.7 (7.2)  | 49.4 (7.1)  |
| Red and processed meat (servings/day)                                   | 0.29 (0.13)                            | 0.60 (0.08) | 0.86 (0.08) | 1.17 (0.11) | 1.83 (0.51) |
| Red meat (servings/day)                                                 | 0.22 (0.11)                            | 0.42 (0.12) | 0.60 (0.16) | 0.81 (0.23) | 1.14 (0.41) |
| Processed meat (servings/day)                                           | 0.07 (0.08)                            | 0.18 (0.11) | 0.25 (0.16) | 0.35 (0.23) | 0.69 (0.48) |
| Family history of melanoma (%)                                          | 2.6                                    | 2.7         | 2.8         | 2.7         | 3.0         |
| Red or blonde hair (%)                                                  | 15.4                                   | 16.1        | 16.1        | 15.2        | 15.8        |
| Number of arm moles $\geq 6$ (%)                                        | 4.2                                    | 4.7         | 4.7         | 4.7         | 4.9         |
| Painful burn or blistering sun reaction as child or adolescent (%)      | 33.8                                   | 34.3        | 34.1        | 34.8        | 34.9        |
| Lifetime blistering sunburns $\geq 6$ (%)                               | 7.4                                    | 7.1         | 7.7         | 6.9         | 7.6         |
| Annual UV flux at residence ( $\times 10^{-4}$ Robertson-Berger units)† | 123 (25)                               | 121 (24)    | 121 (24)    | 122 (25)    | 122 (25)    |
| Deep tan after sun exposure as child or adolescent (%)                  | 25.3                                   | 24.0        | 22.9        | 23.0        | 22.3        |
| Body mass index ( $\text{kg}/\text{m}^2$ )                              | 24.2 (4.2)                             | 24.8 (4.4)  | 25.0 (4.7)  | 25.2 (4.9)  | 25.8 (5.4)  |
| Physical activity level (metabolic-equivalents hours/week)              | 17.8 (25.6)                            | 15.1 (24.1) | 13.4 (17.4) | 12.7 (17.9) | 11.7 (17.2) |
| Current smoker (%)                                                      | 20.2                                   | 23.6        | 24.5        | 26.0        | 27.6        |
| Caloric intake (kcal/day)                                               | 1404 (450)                             | 1558 (431)  | 1710 (441)  | 1872 (460)  | 2180 (501)  |
| Alcohol intake (grams/day)                                              | 6.2 (10.4)                             | 6.9 (10.9)  | 7.1 (11.3)  | 7.1 (11.5)  | 7.3 (12.2)  |
| Coffee intake (cups/day)                                                | 1.5 (1.7)                              | 1.7 (1.7)   | 1.8 (1.7)   | 1.9 (1.8)   | 2.0 (1.8)   |
| Total citrus intake (servings/day)                                      | 0.9 (0.8)                              | 0.9 (0.7)   | 0.9 (0.7)   | 0.9 (0.7)   | 0.9 (0.8)   |
| <b>Men in HPFS (1986)</b>                                               |                                        |             |             |             |             |
| Age (years)                                                             | 55.9 (10.0)                            | 54.6 (10.0) | 54.0 (9.9)  | 53.8 (9.7)  | 53.1 (9.5)  |
| Red and processed meat (servings/day)                                   | 0.18 (0.12)                            | 0.51 (0.09) | 0.84 (0.10) | 1.23 (0.14) | 2.08 (0.68) |

|                                                                                     |             |             |             |             |             |
|-------------------------------------------------------------------------------------|-------------|-------------|-------------|-------------|-------------|
| Red meat (servings/day)                                                             | 0.13 (0.09) | 0.35 (0.12) | 0.56 (0.18) | 0.80 (0.26) | 1.20 (0.51) |
| Processed meat (servings/day)                                                       | 0.05 (0.06) | 0.16 (0.11) | 0.28 (0.17) | 0.43 (0.26) | 0.88 (0.61) |
| Family history of melanoma (%)                                                      | 3.1         | 2.9         | 3.4         | 2.9         | 3.1         |
| Red or blonde hair (%)                                                              | 12.2        | 13.2        | 14.7        | 14.5        | 15.2        |
| Number of arm moles $\geq 6$ (%)                                                    | 5.2         | 5.4         | 5.8         | 5.5         | 5.1         |
| Painful burn or blistering sun reaction as child or adolescent (%)                  | 53.3        | 55.0        | 55.2        | 55.5        | 55.1        |
| Lifetime blistering sunburns $\geq 6$ (%)                                           | 13.2        | 13.2        | 13.9        | 14.2        | 14.1        |
| Annual UV flux at residence ( $\times 10^{-4}$ Robertson-Berger units) <sup>†</sup> | 130 (28)    | 129 (27)    | 130 (28)    | 130 (27)    | 132 (27)    |
| Body mass index (kg/m <sup>2</sup> )                                                | 24.3 (4.8)  | 24.7 (5.0)  | 25.0 (5.0)  | 25.2 (5.2)  | 25.5 (5.2)  |
| Physical activity level (metabolic-equivalents hours/week)                          | 27.0 (34.8) | 22.1 (28.6) | 19.9 (29.5) | 18.6 (28.3) | 17.3 (24.2) |
| Current smoker (%)                                                                  | 4.8         | 7.8         | 10.6        | 11.6        | 15.0        |
| Caloric intake (kcal/day)                                                           | 1679 (535)  | 1760 (510)  | 1905 (518)  | 2112 (549)  | 2489 (606)  |
| Alcohol intake (grams/day)                                                          | 8.8 (13.0)  | 11.1 (15.0) | 12.3 (16.2) | 13.1 (17.0) | 14.5 (19.1) |
| Coffee intake (cups/day)                                                            | 0.9 (1.3)   | 1.1 (1.4)   | 1.3 (1.6)   | 1.5 (1.6)   | 1.7 (1.8)   |
| Total citrus intake (servings/day)                                                  | 1.1 (1.0)   | 1.0 (0.9)   | 0.9 (0.9)   | 0.9 (0.8)   | 0.9 (0.8)   |

\*All variables other than age have been standardized to age distribution of the study population; values are means (SD) or percentages.

<sup>†</sup>Estimate of amount of UV radiation reaching Earth's surface within 1 year.

**Supplemental Table II.** Hazard ratios (HRs) and 95% confidence intervals of melanoma risk according to intake quintiles of red and processed meat, red meat, and processed meat intake in Nurses' Health Study (NHS, 1984 – 2010) and Health Professionals Follow-Up Study (HPFS, 1986 – 2010)

|                               | Intake quintile |                  |                  |                  |                  | <i>P</i> for trend* |
|-------------------------------|-----------------|------------------|------------------|------------------|------------------|---------------------|
|                               | 1               | 2                | 3                | 4                | 5                |                     |
| <b>Red and processed meat</b> |                 |                  |                  |                  |                  |                     |
| <b>NHS</b>                    |                 |                  |                  |                  |                  |                     |
| Median (servings/day)         | 0.33            | 0.57             | 0.85             | 1.14             | 1.64             |                     |
| No. of cases                  | 147             | 146              | 138              | 130              | 118              |                     |
| Age-adjusted HR               | 1.00            | 1.00 (0.80-1.26) | 0.96 (0.76-1.21) | 0.91 (0.71-1.15) | 0.83 (0.65-1.05) | 0.10                |
| Multivariable HR†             | 1.00            | 0.99 (0.78-1.25) | 0.94 (0.74-1.19) | 0.88 (0.69-1.13) | 0.81 (0.62-1.06) | 0.10                |
| <b>HPFS</b>                   |                 |                  |                  |                  |                  |                     |
| Median (servings/day)         | 0.20            | 0.50             | 0.85             | 1.21             | 1.91             |                     |
| No. of cases                  | 133             | 140              | 145              | 122              | 99               |                     |
| Age-adjusted HR               | 1.00            | 1.07 (0.85-1.36) | 1.13 (0.89-1.43) | 0.95 (0.74-1.21) | 0.78 (0.60-1.01) | 0.02                |
| Multivariable HR†             | 1.00            | 1.07 (0.84-1.36) | 1.13 (0.89-1.43) | 0.94 (0.73-1.22) | 0.82 (0.63-1.07) | 0.05                |
| <b>Pooled</b>                 |                 |                  |                  |                  |                  |                     |
| Multivariable HR†             | 1.00            | 1.00 (0.87-1.14) | 0.98 (0.86-1.13) | 0.89 (0.77-1.02) | 0.81 (0.70-0.95) | 0.002               |
| <b>Red meat</b>               |                 |                  |                  |                  |                  |                     |
| <b>NHS</b>                    |                 |                  |                  |                  |                  |                     |
| Median (servings/day)         | 0.20            | 0.43             | 0.57             | 0.71             | 1.07             |                     |
| No. of cases                  | 153             | 135              | 140              | 132              | 119              |                     |
| Age-adjusted HR               | 1.00            | 0.88 (0.70-1.11) | 0.94 (0.75-1.18) | 0.88 (0.69-1.11) | 0.79 (0.62-1.01) | 0.08                |
| Multivariable HR†             | 1.00            | 0.86 (0.68-1.09) | 0.90 (0.71-1.13) | 0.84 (0.66-1.07) | 0.76 (0.59-0.98) | 0.04                |
| <b>HPFS</b>                   |                 |                  |                  |                  |                  |                     |
| Median (servings/day)         | 0.13            | 0.29             | 0.56             | 0.71             | 1.28             |                     |
| No. of cases                  | 124             | 148              | 140              | 113              | 114              |                     |
| Age-adjusted HR               | 1.00            | 1.22 (0.96-1.54) | 1.12 (0.88-1.43) | 0.97 (0.75-1.25) | 0.96 (0.75-1.24) | 0.20                |
| Multivariable HR†             | 1.00            | 1.23 (0.96-1.56) | 1.10 (0.86-1.41) | 0.96 (0.74-1.25) | 0.99 (0.76-1.29) | 0.29                |
| <b>Pooled</b>                 |                 |                  |                  |                  |                  |                     |
| Multivariable HR†             | 1.00            | 1.02 (0.70-1.47) | 0.98 (0.78-1.23) | 0.89 (0.74-1.06) | 0.86 (0.65-1.14) | 0.04                |
| <b>Processed meat</b>         |                 |                  |                  |                  |                  |                     |
| <b>NHS</b>                    |                 |                  |                  |                  |                  |                     |
| Median (servings/day)         | 0.00            | 0.13             | 0.21             | 0.35             | 0.71             |                     |
| No. of cases                  | 151             | 134              | 138              | 139              | 117              |                     |
| Age-adjusted HR               | 1.00            | 0.92 (0.73-1.16) | 0.94 (0.75-1.19) | 0.96 (0.76-1.21) | 0.81 (0.64-1.03) | 0.24                |
| Multivariable HR†             | 1.00            | 0.92 (0.73-1.16) | 0.95 (0.75-1.20) | 0.97 (0.76-1.23) | 0.84 (0.65-1.08) | 0.41                |

| <b>HPFS</b>           |      |                  |                  |                  |                  |      |
|-----------------------|------|------------------|------------------|------------------|------------------|------|
| Median (servings/day) | 0.00 | 0.13             | 0.21             | 0.43             | 0.92             |      |
| No. of cases          | 124  | 148              | 134              | 130              | 103              |      |
| Age-adjusted HR       | 1.00 | 1.05 (0.83-1.34) | 1.03 (0.81-1.32) | 1.00 (0.78-1.28) | 0.79 (0.61-1.03) | 0.02 |
| Multivariable HR†     | 1.00 | 1.06 (0.83-1.35) | 1.05 (0.82-1.34) | 1.02 (0.79-1.31) | 0.84 (0.64-1.09) | 0.07 |
| <b>Pooled</b>         |      |                  |                  |                  |                  |      |
| Multivariable HR†     | 1.00 | 0.97 (0.82-1.15) | 0.99 (0.83-1.17) | 0.98 (0.83-1.17) | 0.83 (0.69-1.00) | 0.05 |

\**P* for trend calculated using median intake of each quintile of red meat and processed meat intake as a continuous variable.

†Age, family history of melanoma (yes vs. no), natural hair color (red, blonde, light brown, or dark brown/black), number of arm moles (0, 1-2, 3-5, or  $\geq 6$ ), sunburn susceptibility as child or adolescent (none or some redness, burn, or painful burn/blisters), number of lifetime blistering sunburns (0, 1-2, 3-5, or  $\geq 6$ ), cumulative UV flux since baseline (quintiles), type of tan after repeated sun exposure as a child or adolescent (none, light, average, or deep), body mass index (<18.5, 18.5-24.9, 25.0-29.9, 30.0-34.9, or  $\geq 35.0$  kg/m<sup>2</sup>), physical activity (quintiles), smoking status (never; past with <10, 10-19, 20-39, >40 pack years; current <25, 25-44, >45 pack years), intake of total energy (quintiles), alcohol intake (0, 0.1-4.9, 5.0-9.9, 10.0-19.9, or  $\geq 20.0$  grams per day), coffee intake (quintiles), and citrus consumption (quintiles). Analysis of men did not adjust for type of tan after repeated sun exposure as child or adolescent (data not available), and used a different categorization for smoking status (never; past with <10, 10-19, 20-39, >40 pack years; current).

**Supplemental Table III.** Hazard ratios (HRs) and 95% confidence intervals of melanoma risk according to intake quintiles of specific red and processed meat items in Nurses' Health Study (NHS, 1984 – 2010) and Health Professionals Follow-Up Study (HPFS, 1986 – 2010)

|                     | Intake quintile |                  |                  |                  |                  | <i>P</i> for trend* |
|---------------------|-----------------|------------------|------------------|------------------|------------------|---------------------|
|                     | 1               | 2                | 3                | 4                | 5                |                     |
| <b>Hot dogs</b>     |                 |                  |                  |                  |                  |                     |
| <b>NHS</b>          |                 |                  |                  |                  |                  |                     |
| Median (servings/d) | 0.00            | 0.03             | 0.07             | 0.07             | 0.14             |                     |
| No. of cases        | 184             | 110              | 150              | 133              | 102              |                     |
| Age-adjusted HR     | 1.00            | 0.92 (0.73-1.17) | 0.83 (0.66-1.02) | 1.09 (0.87-1.37) | 0.77 (0.60-0.98) | 0.24                |
| Multivariable HR†   | 1.00            | 0.91 (0.72-1.16) | 0.82 (0.66-1.03) | 1.11 (0.88-1.40) | 0.77 (0.60-0.99) | 0.30                |
| <b>HPFS</b>         |                 |                  |                  |                  |                  |                     |
| Median (servings/d) | 0.00            | 0.00             | 0.03             | 0.07             | 0.14             |                     |
| No. of cases        | 144             | 116              | 120              | 144              | 115              |                     |
| Age-adjusted HR     | 1.00            | 1.23 (0.95-1.60) | 1.25 (0.98-1.59) | 1.09 (0.86-1.38) | 0.99 (0.78-1.27) | 0.41                |
| Multivariable HR†   | 1.00            | 1.19 (0.91-1.55) | 1.22 (0.95-1.56) | 1.11 (0.87-1.41) | 1.02 (0.79-1.31) | 0.66                |
| <b>Pooled</b>       |                 |                  |                  |                  |                  |                     |
| Multivariable HR    | 1.00            | 1.04 (0.81-1.33) | 1.00 (0.69-1.46) | 1.10 (0.93-1.31) | 0.88 (0.66-1.18) | 0.29                |
| <b>Bacon</b>        |                 |                  |                  |                  |                  |                     |
| <b>NHS</b>          |                 |                  |                  |                  |                  |                     |
| Median (servings/d) | 0.00            | 0.02             | 0.06             | 0.09             | 0.17             |                     |
| No. of cases        | 162             | 125              | 129              | 119              | 144              |                     |
| Age-adjusted HR     | 1.00            | 0.97 (0.76-1.23) | 0.87 (0.69-1.10) | 0.93 (0.73-1.18) | 0.94 (0.75-1.18) | 0.60                |
| Multivariable HR†   | 1.00            | 0.94 (0.74-1.20) | 0.86 (0.68-1.09) | 0.91 (0.72-1.16) | 0.93 (0.74-1.18) | 0.62                |
| <b>HPFS</b>         |                 |                  |                  |                  |                  |                     |
| Median (servings/d) | 0.00            | 0.02             | 0.07             | 0.10             | 0.27             |                     |
| No. of cases        | 198             | 72               | 137              | 116              | 116              |                     |
| Age-adjusted HR     | 1.00            | 1.07 (0.81-1.41) | 0.85 (0.68-1.06) | 0.99 (0.78-1.24) | 0.81 (0.64-1.02) | 0.09                |
| Multivariable HR†   | 1.00            | 1.00 (0.75-1.32) | 0.83 (0.67-1.04) | 0.95 (0.75-1.20) | 0.81 (0.64-1.03) | 0.14                |
| <b>Pooled</b>       |                 |                  |                  |                  |                  |                     |
| Multivariable HR    | 1.00            | 0.97 (0.81-1.17) | 0.85 (0.72-0.99) | 0.94 (0.79-1.11) | 0.88 (0.75-1.04) | 0.16                |
| <b>Hamburger</b>    |                 |                  |                  |                  |                  |                     |
| <b>NHS</b>          |                 |                  |                  |                  |                  |                     |
| Median (servings/d) | 0.05            | 0.09             | 0.14             | 0.16             | 0.29             |                     |
| No. of cases        | 150             | 146              | 136              | 117              | 130              |                     |
| Age-adjusted HR     | 1.00            | 1.00 (0.79-1.25) | 0.87 (0.68-1.09) | 0.91 (0.72-1.17) | 0.88 (0.70-1.12) | 0.28                |
| Multivariable HR†   | 1.00            | 0.97 (0.77-1.22) | 0.83 (0.65-1.05) | 0.89 (0.69-1.14) | 0.85 (0.67-1.09) | 0.21                |

|                                                               |      |                  |                  |                  |                  |      |
|---------------------------------------------------------------|------|------------------|------------------|------------------|------------------|------|
| <b>HPFS</b>                                                   |      |                  |                  |                  |                  |      |
| Median (servings/d)                                           | 0.02 | 0.07             | 0.14             | 0.23             | 0.43             |      |
| No. of cases                                                  | 132  | 142              | 134              | 125              | 106              |      |
| Age-adjusted HR                                               | 1.00 | 0.99 (0.78-1.26) | 0.82 (0.64-1.04) | 1.07 (0.84-1.37) | 0.82 (0.63-1.06) | 0.18 |
| Multivariable HR†                                             | 1.00 | 0.99 (0.78-1.25) | 0.82 (0.64-1.05) | 1.04 (0.81-1.34) | 0.85 (0.65-1.10) | 0.29 |
| <b>Pooled</b>                                                 |      |                  |                  |                  |                  |      |
| Multivariable HR                                              | 1.00 | 0.97 (0.82-1.15) | 0.82 (0.69-0.97) | 0.97 (0.81-1.16) | 0.85 (0.71-1.01) | 0.11 |
| <b>Beef, pork, or lamb as a sandwich or mixed dish</b>        |      |                  |                  |                  |                  |      |
| <b>NHS</b>                                                    |      |                  |                  |                  |                  |      |
| Median (servings/d)                                           | 0.03 | 0.08             | 0.14             | 0.19             | 0.33             |      |
| No. of cases                                                  | 146  | 155              | 136              | 125              | 117              |      |
| Age-adjusted HR                                               | 1.00 | 0.88 (0.70-1.11) | 0.80 (0.64-1.02) | 1.02 (0.80-1.30) | 0.74 (0.58-0.95) | 0.12 |
| Multivariable HR†                                             | 1.00 | 0.85 (0.67-1.06) | 0.76 (0.60-0.97) | 0.95 (0.75-1.22) | 0.69 (0.53-0.89) | 0.06 |
| <b>HPFS</b>                                                   |      |                  |                  |                  |                  |      |
| Median (servings/d)                                           | 0.00 | 0.07             | 0.12             | 0.15             | 0.43             |      |
| No. of cases                                                  | 125  | 142              | 110              | 143              | 119              |      |
| Age-adjusted HR                                               | 1.00 | 1.15 (0.90-1.47) | 0.99 (0.77-1.29) | 1.17 (0.92-1.50) | 0.97 (0.75-1.25) | 0.66 |
| Multivariable HR†                                             | 1.00 | 1.14 (0.89-1.45) | 0.96 (0.74-1.25) | 1.13 (0.88-1.44) | 0.96 (0.74-1.24) | 0.58 |
| <b>Pooled</b>                                                 |      |                  |                  |                  |                  |      |
| Multivariable HR                                              | 1.00 | 0.99 (0.75-1.30) | 0.85 (0.67-1.07) | 1.05 (0.88-1.25) | 0.82 (0.60-1.12) | 0.26 |
| <b>Beef, pork, or lamb as a main dish</b>                     |      |                  |                  |                  |                  |      |
| <b>NHS</b>                                                    |      |                  |                  |                  |                  |      |
| Median (servings/d)                                           | 0.07 | 0.14             | 0.23             | 0.33             | 0.46             |      |
| No. of cases                                                  | 135  | 154              | 135              | 145              | 110              |      |
| Age-adjusted HR                                               | 1.00 | 1.12 (0.89-1.41) | 1.10 (0.87-1.40) | 1.01 (0.80-1.28) | 0.94 (0.73-1.21) | 0.38 |
| Multivariable HR†                                             | 1.00 | 1.11 (0.88-1.41) | 1.07 (0.84-1.36) | 0.99 (0.77-1.26) | 0.94 (0.72-1.22) | 0.36 |
| <b>HPFS</b>                                                   |      |                  |                  |                  |                  |      |
| Median (servings/d)                                           | 0.07 | 0.14             | 0.18             | 0.34             | 0.48             |      |
| No. of cases                                                  | 125  | 113              | 163              | 140              | 98               |      |
| Age-adjusted HR                                               | 1.00 | 1.11 (0.86-1.44) | 1.28 (1.02-1.62) | 1.13 (0.89-1.44) | 0.91 (0.69-1.19) | 0.23 |
| Multivariable HR†                                             | 1.00 | 1.11 (0.86-1.44) | 1.26 (0.99-1.60) | 1.12 (0.87-1.43) | 0.95 (0.72-1.24) | 0.36 |
| <b>Pooled</b>                                                 |      |                  |                  |                  |                  |      |
| Multivariable HR                                              | 1.00 | 1.11 (0.93-1.32) | 1.16 (0.98-1.38) | 1.05 (0.88-1.24) | 0.94 (0.78-1.13) | 0.19 |
| <b>Other processed meats (sausage, salami, bologna, etc.)</b> |      |                  |                  |                  |                  |      |
| <b>NHS</b>                                                    |      |                  |                  |                  |                  |      |
| Median (servings/d)                                           | 0.03 | 0.12             | 0.20             | 0.31             | 0.56             |      |
| No. of cases                                                  | 151  | 134              | 138              | 139              | 117              |      |

|                     |      |                  |                  |                  |                  |      |
|---------------------|------|------------------|------------------|------------------|------------------|------|
| Age-adjusted HR     | 1.00 | 0.92 (0.73-1.16) | 0.94 (0.75-1.19) | 0.96 (0.76-1.21) | 0.81 (0.64-1.03) | 0.24 |
| Multivariable HR†   | 1.00 | 0.92 (0.73-1.16) | 0.94 (0.75-1.19) | 0.96 (0.76-1.22) | 0.83 (0.65-1.08) | 0.38 |
| <b>HPFS</b>         |      |                  |                  |                  |                  |      |
| Median (servings/d) | 0.00 | 0.03             | 0.07             | 0.14             | 0.43             |      |
| No. of cases        | 122  | 91               | 125              | 112              | 87               |      |
| Age-adjusted HR     | 1.00 | 1.09 (0.83-1.44) | 0.98 (0.77-1.26) | 1.07 (0.83-1.39) | 0.80 (0.60-1.05) | 0.04 |
| Multivariable HR†   | 1.00 | 1.10 (0.83-1.45) | 1.00 (0.78-1.29) | 1.11 (0.86-1.45) | 0.84 (0.63-1.12) | 0.09 |
| <b>Pooled</b>       |      |                  |                  |                  |                  |      |
| Multivariable HR    | 1.00 | 0.98 (0.81-1.19) | 0.97 (0.81-1.15) | 1.03 (0.86-1.23) | 0.84 (0.69-1.01) | 0.11 |

\**P* for trend calculated using median intake of each quintile of specific red meat and processed meat intake as a continuous variable.

†Age, family history of melanoma (yes vs. no), natural hair color (red, blonde, light brown, or dark brown/black), number of arm moles (0, 1-2, 3-5, or  $\geq 6$ ), sunburn susceptibility as child or adolescent (none or some redness, burn, or painful burn/blisters), number of lifetime blistering sunburns (0, 1-2, 3-5, or  $\geq 6$ ), cumulative UV flux since baseline (quintiles), type of tan after repeated sun exposure as a child or adolescent (none, light, average, or deep), body mass index (<18.5, 18.5-24.9, 25.0-29.9, 30.0-34.9, or  $\geq 35.0$  kg/m<sup>2</sup>), physical activity (quintiles), smoking status (never; past with <10, 10-19, 20-39, >40 pack years; current <25, 25-44, >45 pack years), intake of total energy (quintiles), alcohol intake (0, 0.1-4.9, 5.0-9.9, 10.0-19.9, or  $\geq 20.0$  grams per day), coffee intake (quintiles), and citrus consumption (quintiles). Analysis of men did not adjust for type of tan after repeated sun exposure as child or adolescent (data not available), and used a different categorization for smoking status (never; past with <10, 10-19, 20-39, >40 pack years; current).

**Supplemental Table IV.** Hazard ratios (HRs) and 95% confidence intervals of melanoma risk by tumor location according to red and processed meat intake quintiles in Nurses' Health Study (NHS, 1984 – 2010) and Health Professionals Follow-Up Study (HPFS, 1986 – 2010)

|                                                                           | Intake quintile |                  |                  |                  |                  | <i>P</i> for trend* |
|---------------------------------------------------------------------------|-----------------|------------------|------------------|------------------|------------------|---------------------|
|                                                                           | 1               | 2                | 3                | 4                | 5                |                     |
| <b>NHS</b>                                                                |                 |                  |                  |                  |                  |                     |
| High sun exposure sites (head, neck, and extremities)                     |                 |                  |                  |                  |                  |                     |
| No. of cases                                                              | 102             | 94               | 102              | 80               | 85               |                     |
| Multivariable HR†                                                         | 1.00            | 0.93 (0.70-1.24) | 1.03 (0.78-1.37) | 0.83 (0.61-1.13) | 0.94 (0.69-1.28) | 0.60                |
| Low sun exposure sites (truncal, shoulder, back, hip, abdomen, and chest) |                 |                  |                  |                  |                  |                     |
| No. of cases                                                              | 44              | 46               | 34               | 47               | 29               |                     |
| Multivariable HR†                                                         | 1.00            | 0.96 (0.63-1.46) | 0.68 (0.43-1.08) | 0.89 (0.58-1.38) | 0.50 (0.30-0.84) | 0.01                |
| <b>HPFS</b>                                                               |                 |                  |                  |                  |                  |                     |
| High sun exposure sites (head, neck, and extremities)                     |                 |                  |                  |                  |                  |                     |
| No. of cases                                                              | 60              | 63               | 72               | 52               | 52               |                     |
| Multivariable HR†                                                         | 1.00            | 1.09 (0.77-1.56) | 1.28 (0.90-1.81) | 0.91 (0.62-1.33) | 1.01 (0.68-1.48) | 0.60                |
| Low sun exposure sites (truncal, shoulder, back, hip, abdomen, and chest) |                 |                  |                  |                  |                  |                     |
| No. of cases                                                              | 54              | 59               | 58               | 49               | 40               |                     |
| Multivariable HR†                                                         | 1.00            | 1.06 (0.73-1.54) | 1.04 (0.71-1.51) | 0.87 (0.58-1.29) | 0.74 (0.48-1.13) | 0.07                |
| <b>Pooled</b>                                                             |                 |                  |                  |                  |                  |                     |
| High sun exposure sites (head, neck, and extremities)                     |                 |                  |                  |                  |                  |                     |
| No. of cases                                                              | 162             | 157              | 174              | 132              | 137              |                     |
| Multivariable HR†                                                         | 1.00            | 0.99 (0.80-1.24) | 1.12 (0.90-1.40) | 0.86 (0.68-1.09) | 0.96 (0.76-1.23) | 0.46                |
| Low sun exposure sites (truncal, shoulder, back, hip, abdomen, and chest) |                 |                  |                  |                  |                  |                     |
| No. of cases                                                              | 98              | 105              | 92               | 96               | 69               |                     |
| Multivariable HR†                                                         | 1.00            | 1.02 (0.77-1.34) | 0.86 (0.57-1.29) | 0.88 (0.65-1.18) | 0.63 (0.43-0.91) | 0.02                |

\**P* for trend calculated using median intake of each quintile of red meat and processed meat intake as a continuous variable.

†Age, family history of melanoma (yes vs. no), natural hair color (red, blonde, light brown, or dark brown/black), number of arm moles (0, 1-2, 3-5, or ≥6), sunburn susceptibility as child or adolescent (none or some redness, burn, or painful burn/blisters), number of lifetime blistering sunburns (0, 1-2, 3-5, or ≥6), cumulative UV flux since baseline (quintiles), type of tan after repeated sun exposure as a child or adolescent (none, light, average, or deep), body mass index (<18.5, 18.5-24.9, 25.0-29.9, 30.0-34.9, or ≥35.0 kg/m<sup>2</sup>), physical activity (quintiles), smoking status (never; past with <10, 10-19, 20-39, >40 pack years; current <25, 25-44, >45 pack years), intake of total energy (quintiles), alcohol intake (0, 0.1-4.9, 5.0-9.9, 10.0-19.9, or ≥20.0 grams per day), coffee intake (quintiles), and citrus consumption (quintiles). Analysis of men did not adjust for type of tan after repeated sun exposure as child or



adolescent (data not available), and used a different categorization for smoking status (never; past with <10, 10-19, 20-39, >40 pack years; current).

**Supplemental Table V.** Pooled multivariable hazard ratios (HRs) and 95% confidence intervals of melanoma risk according to intake quintiles of red and processed meat intake by melanoma risk factors and Breslow thickness of melanoma in Nurses' Health Study (NHS, 1984 – 2010) and Health Professionals Follow-Up Study (HPFS, 1986 – 2010)

|                                                                        | Intake quintile |                  |                  |                  |                  | <i>P</i> for trend* |
|------------------------------------------------------------------------|-----------------|------------------|------------------|------------------|------------------|---------------------|
|                                                                        | 1               | 2                | 3                | 4                | 5                |                     |
| <b>Sunburn susceptibility as a child or adolescent</b>                 |                 |                  |                  |                  |                  |                     |
| None or only redness or tan only                                       |                 |                  |                  |                  |                  |                     |
| No. of cases                                                           | 79              | 79               | 90               | 74               | 89               |                     |
| Multivariable HR†                                                      | 1.00            | 0.83 (0.39-1.76) | 1.16 (0.85-1.58) | 0.93 (0.67-1.30) | 1.21 (0.87-1.68) | 0.18                |
| Burning or blisters or peeling                                         |                 |                  |                  |                  |                  |                     |
| No. of cases                                                           | 164             | 183              | 165              | 149              | 107              |                     |
| Multivariable HR†                                                      | 1.00            | 1.07 (0.69-1.64) | 0.96 (0.58-1.59) | 0.87(0.69-1.10)  | 0.65 (0.43-0.96) | 0.01                |
| <b>Personal history of non-melanoma skin cancer</b>                    |                 |                  |                  |                  |                  |                     |
| None                                                                   |                 |                  |                  |                  |                  |                     |
| No. of cases                                                           | 223             | 220              | 222              | 200              | 166              |                     |
| Multivariable HR†                                                      | 1.00            | 0.97 (0.81-1.17) | 0.99 (0.82-1.20) | 0.87 (0.71-1.06) | 0.74 (0.58-0.95) | 0.002               |
| Present                                                                |                 |                  |                  |                  |                  |                     |
| No. of cases                                                           | 57              | 66               | 61               | 52               | 51               |                     |
| Multivariable HR†                                                      | 1.00            | 1.20 (0.83-1.72) | 1.13 (0.78-1.64) | 1.06 (0.59-1.91) | 1.16 (0.47-2.86) | 0.94                |
| <b>Breslow thickness (NHS median = 0.60 mm; HPFS median = 0.67 mm)</b> |                 |                  |                  |                  |                  |                     |
| Below median                                                           |                 |                  |                  |                  |                  |                     |
| No. of cases                                                           | 124             | 125              | 117              | 98               | 95               |                     |
| Multivariable HR†                                                      | 1.00            | 0.98 (0.76-1.25) | 0.92 (0.71-1.18) | 0.74 (0.56-0.98) | 0.74 (0.56-0.99) | 0.009               |
| Above median                                                           |                 |                  |                  |                  |                  |                     |
| No. of cases                                                           | 101             | 110              | 113              | 101              | 80               |                     |
| Multivariable HR†                                                      | 1.00            | 1.08 (0.82-1.41) | 1.13 (0.86-1.48) | 1.01 (0.76-1.34) | 0.88 (0.65-1.20) | 0.25                |

\**P* for trend calculated using median intake of each quintile of red meat and processed meat intake as a continuous variable.

†Age, family history of melanoma (yes vs. no), natural hair color (red, blonde, light brown, or dark brown/black), number of arm

moles (0, 1-2, 3-5, or  $\geq 6$ ), sunburn susceptibility as child or adolescent (none or some redness, burn, or painful burn/blisters), number of lifetime blistering sunburns (0, 1-2, 3-5, or  $\geq 6$ ), cumulative UV flux since baseline (quintiles), type of tan after repeated sun exposure as a child or adolescent (none, light, average, or deep), body mass index (<18.5, 18.5-24.9, 25.0-29.9, 30.0-34.9, or  $\geq 35.0$  kg/m<sup>2</sup>), physical activity (quintiles), smoking status (never; past with <10, 10-19, 20-39, >40 pack years; current <25, 25-44, >45 pack years), intake of total energy (quintiles), alcohol intake (0, 0.1-4.9, 5.0-9.9, 10.0-19.9, or  $\geq 20.0$  grams per day), coffee intake (quintiles), and citrus consumption (quintiles). Analysis of men did not adjust for type of tan after repeated sun exposure as child or adolescent (data not available), and used a different categorization for smoking status (never; past with <10, 10-19, 20-39, >40 pack years; current). For each stratified analysis, the stratifying variable was omitted from the model.
